# Supplementary material for: Multiple targeting strategies achieve novel protein drug delivery into proapoptosis lung cancer cells by precisely inhibiting survivin
Source: Royal Society of Chemistry journal article supplement (doi:10.1039/d0nr01352h), 2020-01-01
Supplement: d0nr01352h1.pdf [file d0nr01352h1.pdf]

1           **Multiple targeting strategies achieve novel protein drug**  
2           **deliver into cancer cells to proapoptosis lung cancer cell by**  
3                           **precisely inhibiting survivin**

4  
5   **Fabiao Hu<sup>1</sup>, Ting Yan<sup>1</sup>, Wei Guo<sup>1</sup>, Qiuli Liu<sup>2</sup>, Myong Hun Han<sup>1,3</sup>, Chang Liu<sup>1</sup>, Yuping**  
6   **Liu<sup>2</sup>, Wenyun Zheng<sup>\*2</sup>, Fang You<sup>\*4,5</sup>, Yi Yang<sup>5</sup>, Wenliang Zhang<sup>6</sup>, Xingyuan Ma<sup>\*1</sup>**

7  
8   <sup>1</sup>*State Key Laboratory of Bioreactor Engineering, East China University of Science and*  
9   *Technology, Shanghai 200237, P. R. China*

10   <sup>2</sup>*Shanghai Key Laboratory of New Drug Design, School of Pharmacy, East China*  
11   *University of Science and Technology, Shanghai 200237, P. R. China*

12   <sup>3</sup>*Department of Genetics, Faculty of Life Science, KIM IL SUNG University, Pyongyang*  
13   *999093, Democratic Peoples Republic of Korea*

14   <sup>4</sup>*Department of Chemical and Biomolecular Engineering, National University of*  
15   *Singapore, Singapore 117585, Singapore*

16   <sup>5</sup>*SinGENE Biotech Pte Ltd, Singapore Science Park, Singapore 118258, Singapore*

17   <sup>6</sup>*Center of Translational Biomedical Research, University of North Carolina at*  
18   *Greensboro, Greensboro, North Carolina 27310, United States*

19

20

21

22

23

24

25

26   *\*Correspondence:*

27   *Wenyun Zheng*

28   *zwy@ecust.edu.cn*

29   *Fang You*

30   *youfang@nus.edu.sg*

31   *Xingyuan Ma*

32   *maxy@ecust.edu.cn*

33

34

# Supporting Information

1  
2  
3  
4

## Figure legends:

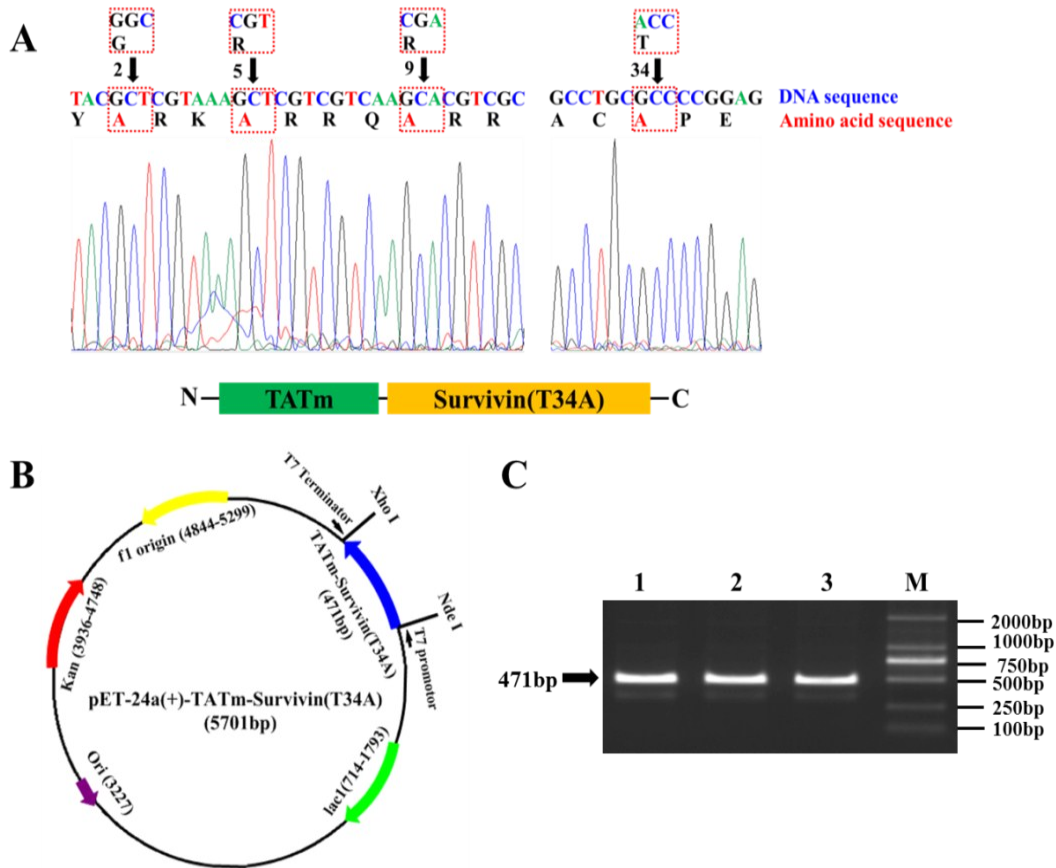

5  
6  
7  
8  
9  
10  
11  
12  
13  
14  
15  
16  
17  
18  
19

**Figure S1.** Construction of recombinant plasmid pET-24a(+)-TATm-Survivin (T34A). (A) Results of DNA sequence and amino acid sequence showed G2A, R5A, and R9A mutations in TAT peptide gene and T34A mutation in the survivin gene after PCR amplification. (B) Schematic diagram of the construction of recombinant plasmid pET-24a(+)-TATm-Survivin (T34A). (C) Agarose gel electrophoresis of TATm-Survivin (T34A) via PCR amplification. Lane M, DL2000 marker; lane 1-3, TATm-Survivin (T34A) amplification fragment.

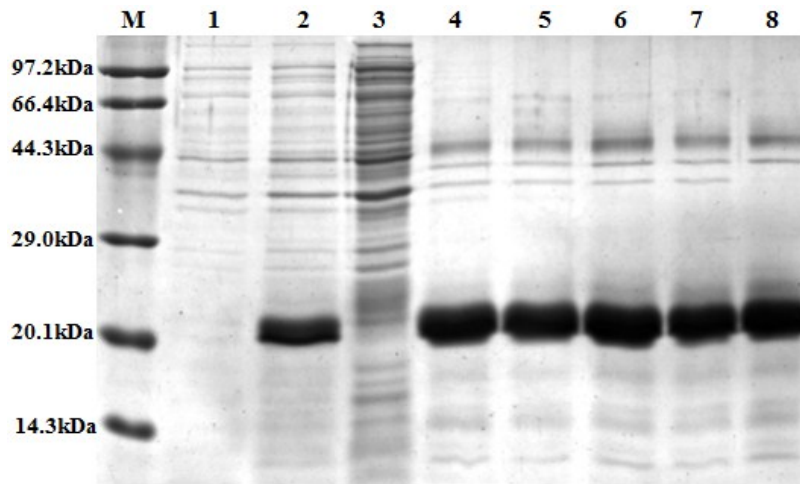

1  
2 **Figure S2.** Expression and inclusion body washing of TmSm protein analyzed by SDS-  
3 PAGE electrophoresis. Lane M, protein marker; lane 1, whole bacterial solution before  
4 induction; lane 2, whole bacterial solution after induction; lane 3, the collected  
5 supernatant after cell disruption; lane 4, the collected precipitation after cell disruption;  
6 lane 5-7, inclusion body of TmSm protein after 1, 2, and 3 washings, respectively; lane 8,  
7 the dissolved inclusion body.

8  
9  
10  
11  
12  
13  
14  
15  
16  
17  
18  
19  
20  
21  
22  
23  
24  
25  
26  
27  
28  
29  
30

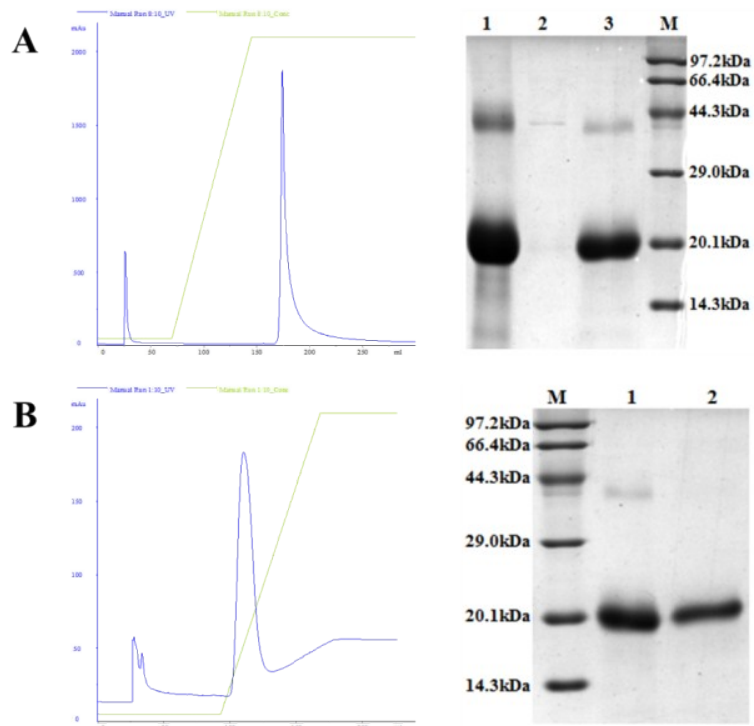

1  
2 **Figure S3.** Purification of TmSm protein and SDS-PAGE analysis. (A) On-column  
3 refolding of TmSm protein *via* SP sepharose chromatogram and SDS-PAGE analysis.  
4 Lane M, protein marker; lane 1, the dissolved inclusion body; lane 2, column filtrate; lane  
5 3, SP column eluate. (B) Purification of TmSm protein *via* nickel column chromatogram  
6 and SDS-PAGE analysis. Lane M, protein marker; lane 1, SP column eluate; lane 2,  
7 nickel column eluate.

8  
9  
10  
11  
12  
13  
14  
15  
16  
17  
18  
19  
20  
21  
22  
23  
24

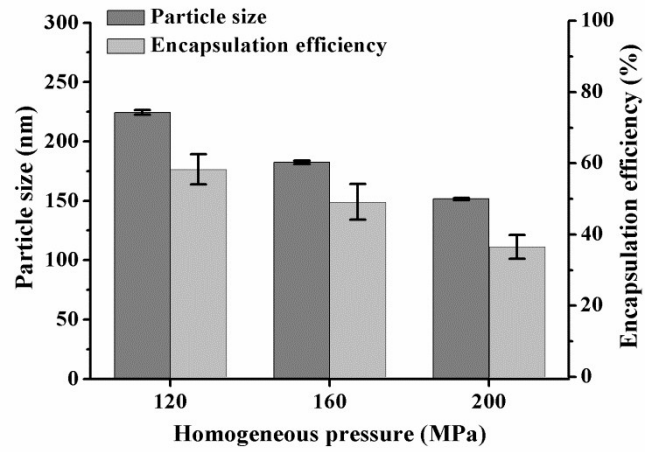

1  
2 **Figure S4.** Particle size and EE of TmSm/PLGA NPs produced by high-pressure  
3 homogenization with 120, 160, and 200 MPa for 1 cycle, respectively. Data were  
4 expressed as mean  $\pm$  SD (n = 3).

5  
6  
7  
8  
9  
10  
11  
12  
13  
14  
15  
16  
17  
18  
19  
20  
21  
22  
23  
24  
25  
26  
27  
28  
29  
30  
31  
32  
33

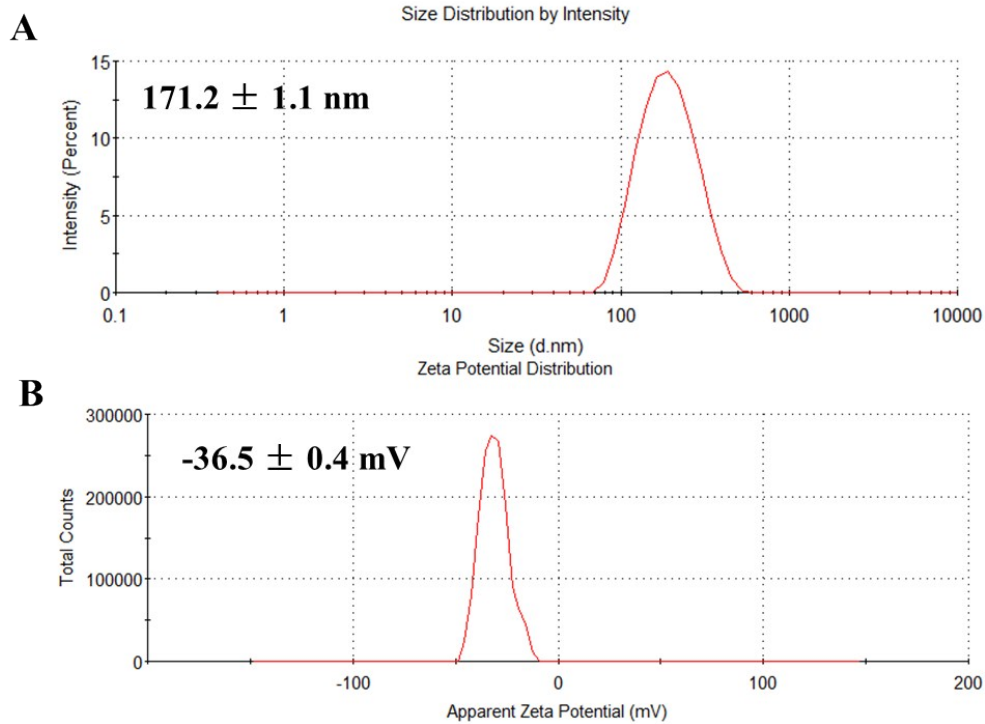

1  
 2 **Figure S5.** Particle size (A) and zeta potential (B) of blank PLGA NPs without PEGylation.  
 3 Data were expressed as mean  $\pm$  SD (n = 3).

4  
 5  
 6  
 7  
 8  
 9  
 10  
 11  
 12  
 13  
 14  
 15  
 16  
 17  
 18  
 19  
 20  
 21  
 22  
 23  
 24  
 25  
 26  
 27

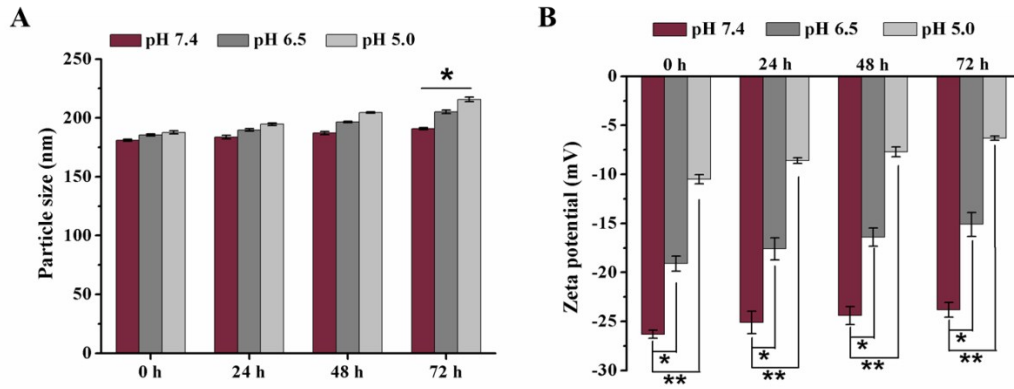

1  
2 **Figure S6.** Particle size (A) and zeta potential (B) of TmSm/PLGA NPs after incubation  
3 with different pH media for 24, 48, and 72 h, respectively. Data were expressed as mean  
4  $\pm$  SD (n = 3). \* $P$  < 0.05 and \*\* $P$  < 0.01.

5  
6  
7  
8  
9  
10  
11  
12  
13  
14  
15  
16  
17  
18  
19  
20  
21  
22  
23  
24  
25  
26  
27  
28  
29  
30  
31  
32  
33  
34

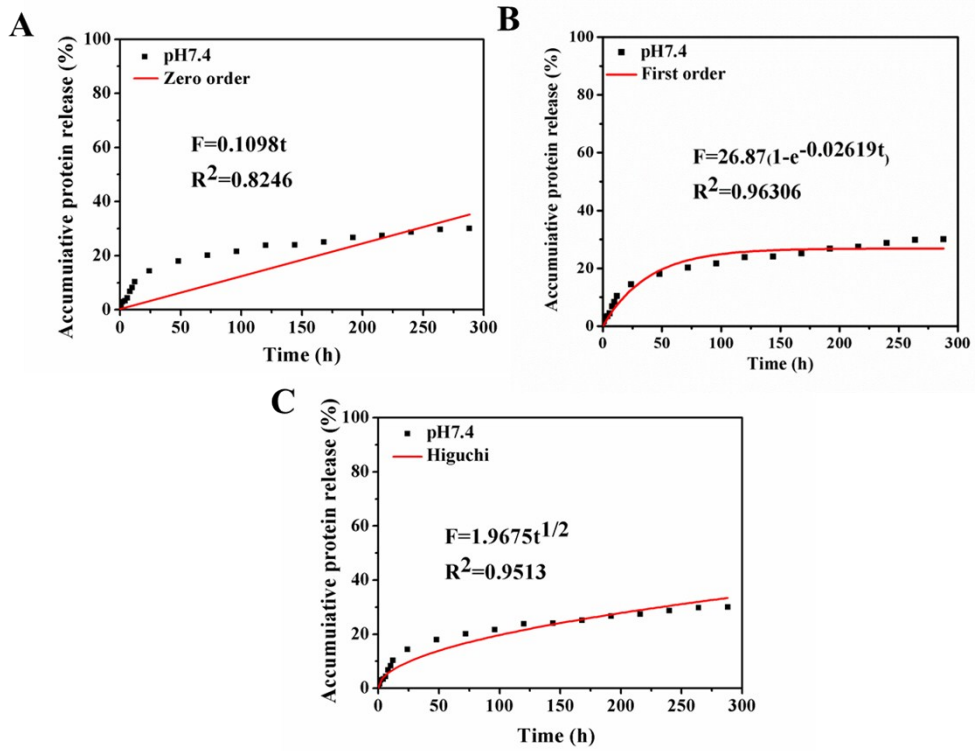

1

2 **Figure S7.** Release kinetics plots for TmSm from PLGA NPs were evaluated by (A) Zero-

3 order, (B) First-order, and (C) Higuchi models, respectively.

4

5

6

7

8

9

10

11

12

13

14

15

16

17

18

19

20

21

22

23

24

25



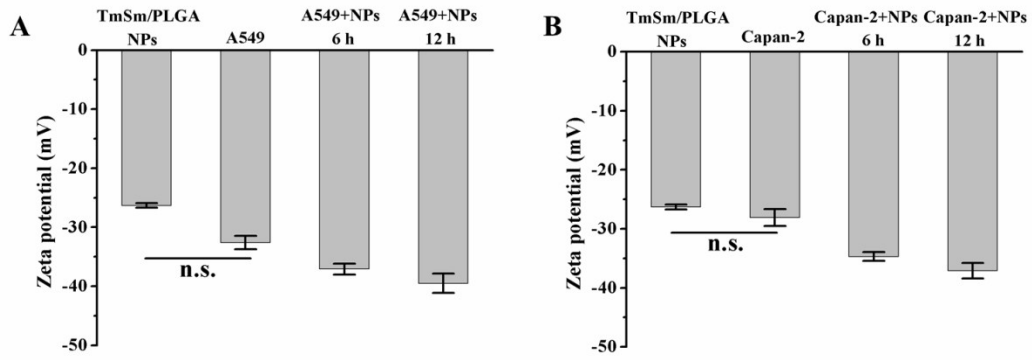

1  
2 **Figure S8.** Zeta potential change of A549 cells (A) and Capan-2 cells (B) after incubated  
3 with TmSm/PLGA NPs for 6 and 12 h, respectively. Data were expressed as mean  $\pm$  SD  
4 (n = 3). n.s. represented not significant.

5  
6  
7  
8  
9  
10  
11  
12  
13  
14  
15  
16  
17  
18  
19  
20  
21  
22  
23  
24  
25  
26  
27  
28  
29  
30  
31  
32  
33  
34

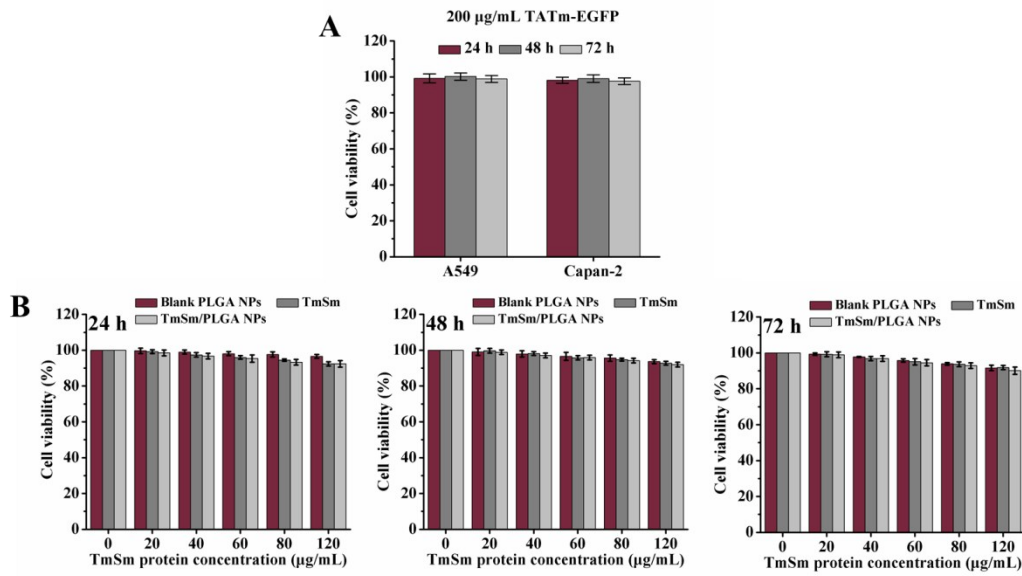

1  
2 **Figure S9.** Cytotoxicity assay. (A) The viabilities of A549 and Capan-2 cells treated with  
3 TATm-EGFP protein at 200 µg/mL (equivalent to the maximum molar concentration of  
4 TmSm) for 24, 48, and 72 h, respectively. (B) L-02 cells were incubated with TmSm,  
5 blank PLGA NPs, and TmSm/PLGA NPs for 24, 48, and 72 h, respectively. Data were  
6 expressed as mean ± SD (n = 3).

7  
8  
9  
10  
11  
12  
13  
14  
15  
16  
17  
18  
19  
20  
21  
22  
23  
24  
25  
26  
27

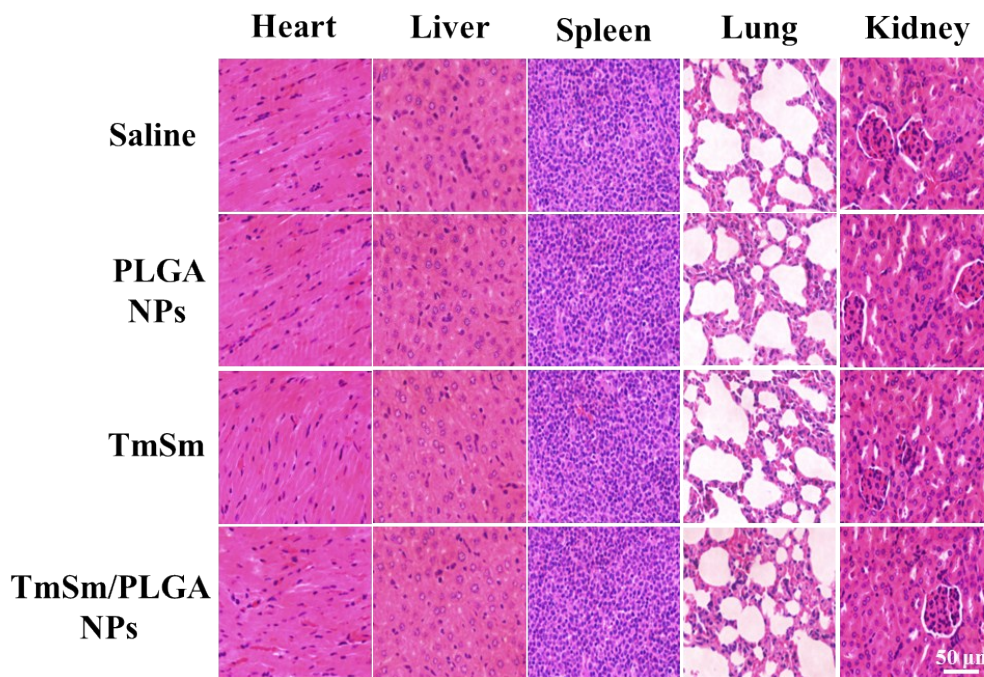

1

2 **Figure S10.** Histological examination of major organs. After A549 tumor-bearing nude  
 3 mice were treated with saline, TmSm, blank PLGA NPs, and TmSm/PLGA NPs for 15  
 4 days, major organs (heart, liver, spleen, lung, and kidney) were collected and fixed with 4%  
 5 paraformaldehyde for paraffin slicing, followed by HE staining for histological examination.  
 6 All the images were taken at 400× magnification. (Bar = 50 μm)

7

8

9

10

11

12

13

14

15

16

17

18

19

1 **Tables:**

2

3 **Table S1.** Mathematical models for the release of TmSm from mPEG-PLGA NPs.

| Release profile | Parameter      | Zero-order | First-order | Higuchi | Ritger-Peppas | Weibull       |
|-----------------|----------------|------------|-------------|---------|---------------|---------------|
| pH 7.4          | R <sup>2</sup> | 0.8246     | 0.9631      | 0.9513  | <b>0.9814</b> | <b>0.9915</b> |
|                 | k              | 0.1098     | 0.0262      | 1.9675  | 4.8601        | 0.0435        |
|                 | n              | /          | 26.8700     | /       | 0.3397        | 32.8654       |
|                 | m              | /          | /           | /       | 2.1451        | 1.5410        |
| pH 6.5          | R <sup>2</sup> | 0.6672     | 0.9014      | 0.4221  | <b>0.9789</b> | <b>0.9944</b> |
|                 | k              | 32.774     | 0.1054      | 4.8176  | 23.4478       | 0.3957        |
|                 | n              | /          | 59.5617     | /       | 0.1932        | 69.5489       |
|                 | m              | /          | /           | /       | -1.8248       | 3.4846        |
| pH 5.0          | R <sup>2</sup> | 0.7018     | 0.9174      | 0.6090  | <b>0.9786</b> | <b>0.9956</b> |
|                 | k              | 36.4848    | 0.0799      | 6.2770  | 27.1000       | 0.4413        |
|                 | n              | /          | 78.7931     | /       | 0.2191        | 91.9163       |
|                 | m              | /          | /           | /       | -3.0627       | 4.4870        |

4

5

6

7

8

9

10

11

12

13

14

15

16

17

18

19

20
